# Supplementary material for: Vaccine Hesitancy: COVID-19 and Influenza Vaccine Willingness among Parents in Wuxi, China—A Cross-Sectional Study
Source: Vaccines (Basel). 2021 Apr 1;9(4):342. doi: 10.3390/vaccines9040342 (PMC8066309; doi:10.3390/vaccines9040342)
Supplement: Supplementary file 1 [file vaccines-09-00342-s001.zip › supplementary material1.pdf]

## **Content**

Figure S1 Wuxi city in China

Figure S2 Areas and Counties in Wuxi city

Table S1 Vaccine hesitancy scale scores by participant's socio-demographics (N=3009)

Figure S3 Parental acceptance of vaccination against COVID-19 and influenza for child

Figure S4 Reasons being willing to accept vaccine against COVID-19

Figure S5 Reasons being not willing to accept vaccine against COVID-19

Table S2 Comparisons to COVID-19 and influenza vaccine acceptance by socio-demographics (N=3009)

Table S3 Relationship between vaccine hesitancy with COVID-19 and influenza vaccination acceptance

Figure S6 Distribution of responses to 10-item of the vaccine hesitancy scale for healthcare workers

Figure S7 Healthcare workers' acceptance of vaccination against COVID-19

Figure S8 Reasons being willing to accept vaccine against COVID-19 for healthcare workers

Figure S9 Reasons being not willing to accept vaccine against COVID-19 for healthcare workers

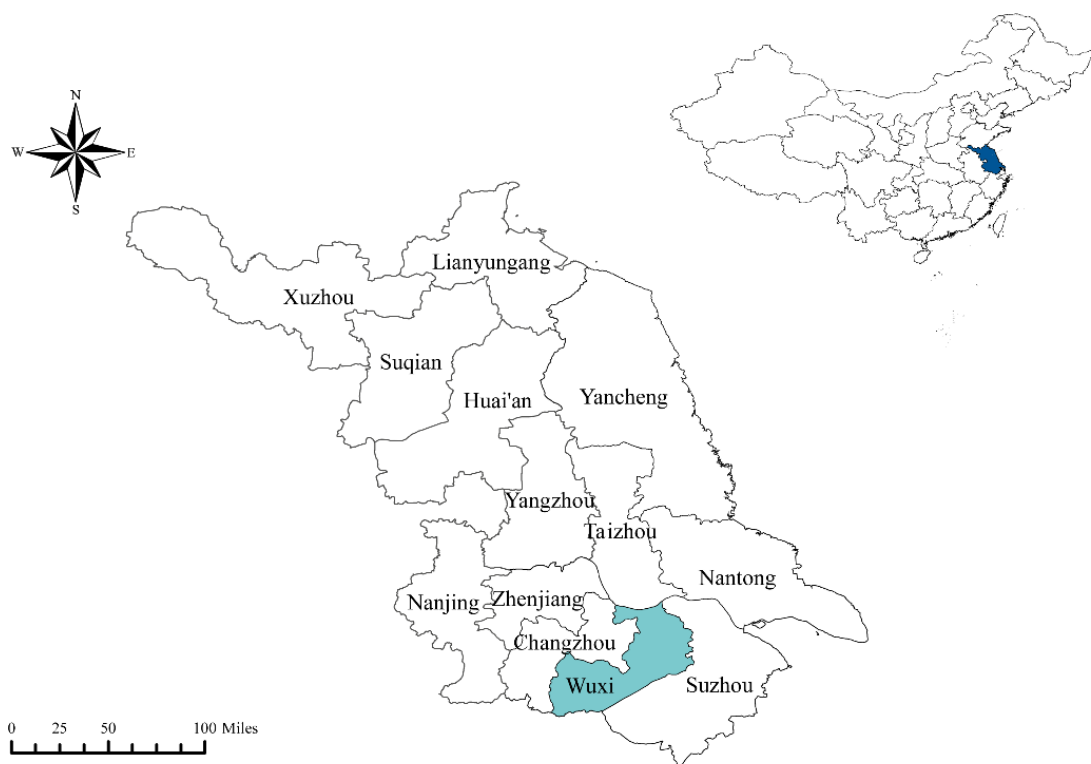

**Figure S1 Wuxi city in China**

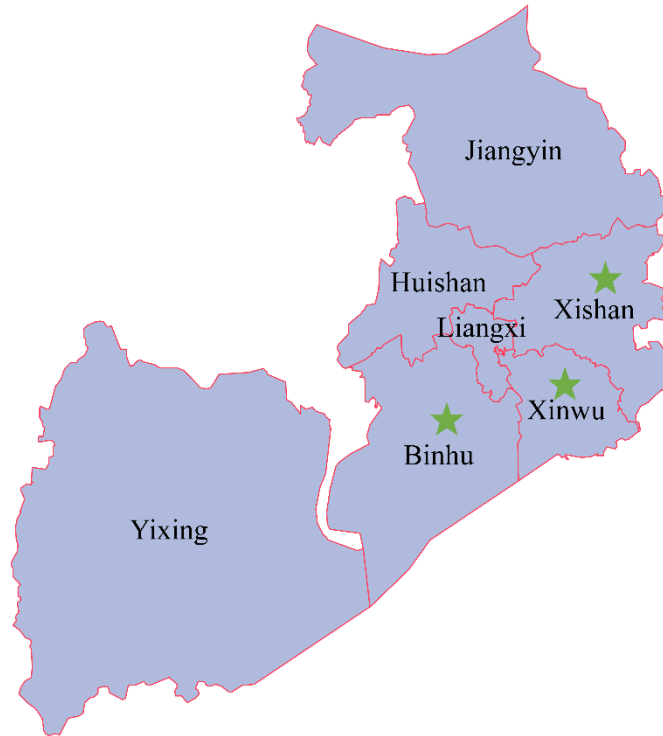

**Figure S2 Areas and Counties in Wuxi city\***

\*Level A (>US\$26 billion) included Jiangyin county and Xinwu area; level B (US\$15–26 billion) included Yixing county, Liangxi area, and Binhu area; and level C (< US\$15 billion) included Huishan area and Xishan area (<http://yw.tj.wuxi.gov.cn:8081/pc/>), the green star represented the selected area.

**Table S1 Vaccine hesitancy scale scores by participant's socio-demographics (N= 3009)**

| Socio-demographics                          |                                    | Category A VHS scores | Category B VHS scores | P value |
|---------------------------------------------|------------------------------------|-----------------------|-----------------------|---------|
| Total                                       |                                    | 40.96±3.87            | 38.58±5.05            | 0.000   |
| <b>Children</b>                             |                                    |                       |                       |         |
| <b>Age group</b>                            |                                    |                       |                       |         |
|                                             | <1                                 | 41.17±3.82            | 38.66±5.13            | 0.000   |
|                                             | 1 –<2                              | 41.07±4.15            | 38.83±5.03            | 0.000   |
|                                             | 2 –<3                              | 41.17±3.98            | 38.18±5.42            | 0.000   |
|                                             | 3 –<4                              | 40.31±3.87            | 38.26±4.67            | 0.000   |
|                                             | 4 –<5                              | 40.64±3.60            | 38.53±4.68            | 0.000   |
|                                             | 5 –<6                              | 41.00±3.47            | 38.56±5.09            | 0.000   |
|                                             | ≥6                                 | 40.82±3.83            | 38.70±5.10            | 0.000   |
|                                             | P value                            | 0.021                 | 0.330                 |         |
| <b>Sex</b>                                  |                                    |                       |                       |         |
|                                             | Male                               | 41.0±3.94             | 38.64±4.99            | 0.000   |
|                                             | Female                             | 40.8±3.79             | 38.52±5.11            | 0.000   |
|                                             | P value                            | 0.696                 | 0.678                 |         |
| <b>Firstborn</b>                            |                                    |                       |                       |         |
|                                             | No                                 | 41.20±3.97            | 38.48±5.24            | 0.000   |
|                                             | Yes                                | 40.83±3.80            | 38.64±4.95            | 0.000   |
|                                             | P value                            | 0.021                 | 0.182                 |         |
| <b>Parents</b>                              |                                    |                       |                       |         |
| <b>Relationship with child</b>              |                                    |                       |                       |         |
|                                             | Mother                             | 40.85±3.73            | 38.45±5.00            | 0.000   |
|                                             | Father                             | 41.28±4.24            | 38.96±5.18            | 0.000   |
|                                             | P value                            | 0.009                 | 0.011                 |         |
| <b>Age group</b>                            |                                    |                       |                       |         |
|                                             | < 26                               | 40.65±3.97            | 38.19±5.41            | 0.000   |
|                                             | 26 –<31                            | 41.05±3.78            | 38.68±4.98            | 0.000   |
|                                             | 31 –<36                            | 40.92±3.77            | 38.56±5.01            | 0.000   |
|                                             | 36 –<41                            | 40.90±4.29            | 38.50±5.15            | 0.000   |
|                                             | ≥41                                | 41.38±3.70            | 39.09±4.93            | 0.000   |
|                                             | P value                            | 0.599                 | 0.559                 |         |
| <b>Educational level</b>                    |                                    |                       |                       |         |
|                                             | Junior high school or below        | 40.84±4.05            | 38.19±5.40            | 0.000   |
|                                             | High school graduate or equivalent | 40.74±3.98            | 38.36±5.08            | 0.000   |
|                                             | College or equivalent              | 41.01±3.77            | 38.68±4.95            | 0.000   |
|                                             | Master's Diploma or above          | 41.26±4.06            | 38.89±5.23            | 0.000   |
|                                             | P value                            | 0.183                 | 0.054                 |         |
| <b>Annual household income (10,000 RMB)</b> |                                    |                       |                       |         |
|                                             | <5                                 | 40.53±4.24            | 37.99±5.28            | 0.000   |
|                                             | 5 –<10                             | 41.20±4.02            | 38.71±5.05            | 0.000   |
|                                             | 10 –<15                            | 40.91±3.77            | 38.42±4.93            | 0.000   |
|                                             | ≥15                                | 40.88±3.73            | 38.70±5.08            | 0.000   |
|                                             | P value                            | 0.152                 | 0.170                 |         |
| <b>Healthcare occupation</b>                |                                    |                       |                       |         |
|                                             | Yes                                | 41.47±3.62            | 39.00±4.84            | 0.000   |
|                                             | No                                 | 40.92±3.88            | 38.55±5.06            | 0.000   |
|                                             | P value                            | 0.178                 | 0.324                 |         |

VHS: vaccine hesitancy scale

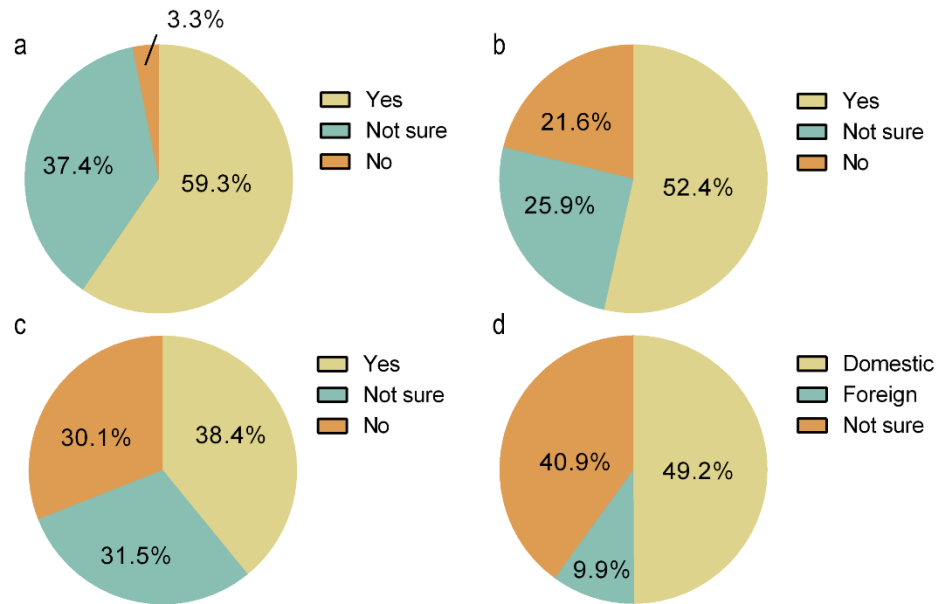

**Figure S3 Parental acceptance of vaccination against COVID-19 and influenza for child†**

†a: Question: If COVID-19 vaccine is available, will you vaccinate for your child? b: Question: will you vaccinate your child against influenza this year? c: Question: Will you be vaccinated against COVID-19 for your child as the first population? d: Question: Will you choose domestic or foreign COVID-19 vaccine for your child?

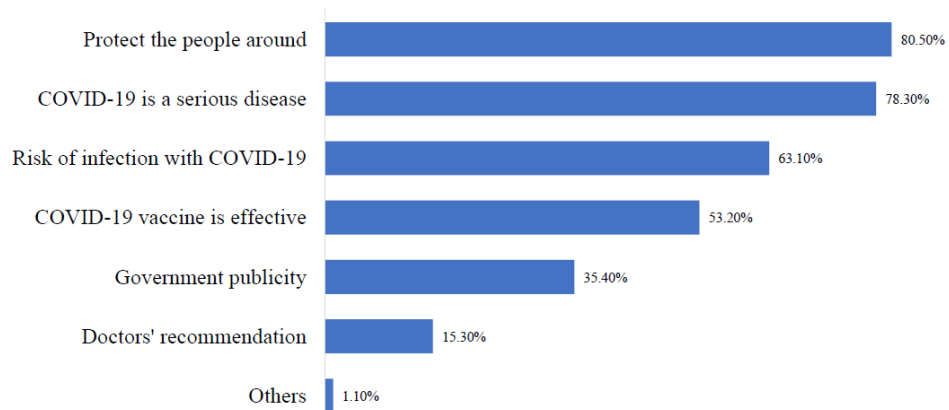

**Figure S4 Reasons being willing to accept vaccine against COVID-19 for parents**

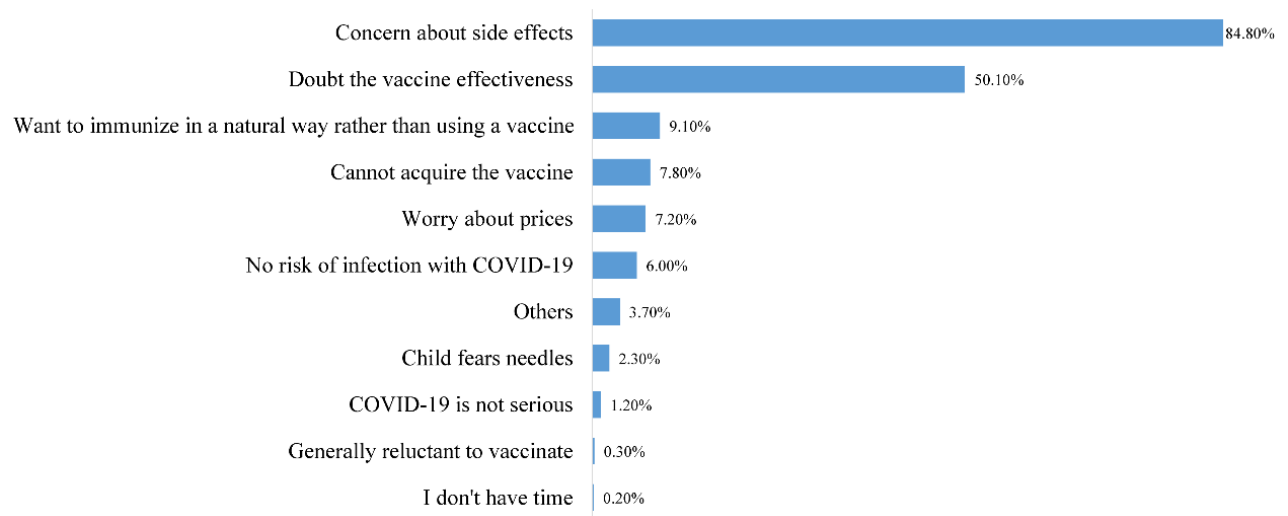

**Figure S5 Reasons being not willing to accept vaccine against COVID-19 for parents**

Table S2 Comparisons to COVID-19 and influenza vaccine acceptance by socio-demographics (N=3009)

| Socio-demographics                          |                                    | COVID-19 vaccine acceptance |                             | Influenza vaccine acceptance |                             |
|---------------------------------------------|------------------------------------|-----------------------------|-----------------------------|------------------------------|-----------------------------|
|                                             |                                    | Yes<br>(N=1793)             | Not Sure and No<br>(N=1216) | Yes<br>(N=1611)              | Not Sure and No<br>(N=1398) |
| <b>Children</b>                             |                                    |                             |                             |                              |                             |
| <b>Age group</b>                            |                                    |                             |                             |                              |                             |
|                                             | <1                                 | 599(56.1%)                  | 468(43.9%)                  | 484(45.4%)                   | 583(54.6%)                  |
|                                             | 1 –<2                              | 287(61.5%)                  | 180(38.5%)                  | 230(49.3%)                   | 237(50.7%)                  |
|                                             | 2 –<3                              | 198(61.7%)                  | 123(38.3%)                  | 136(42.4%)                   | 185(57.6%)                  |
|                                             | 3 –<4                              | 183(61.4%)                  | 115(38.6%)                  | 206(69.1%)                   | 92(30.9%)                   |
|                                             | 4 –<5                              | 186(59.4%)                  | 127(40.6%)                  | 196(62.6%)                   | 117(37.4%)                  |
|                                             | 5 –<6                              | 93(65.5%)                   | 49(34.5%)                   | 102(71.8%)                   | 40(28.2%)                   |
|                                             | ≥6                                 | 247(61.6%)                  | 154(38.4%)                  | 257(64.1%)                   | 144(35.9%)                  |
|                                             | P value                            |                             | 0.139                       |                              | 0.000                       |
| <b>Sex</b>                                  |                                    |                             |                             |                              |                             |
|                                             | Male                               | 909(59.5%)                  | 619(40.5%)                  | 793(51.9%)                   | 735(48.1%)                  |
|                                             | Female                             | 884(59.7%)                  | 597(40.3%)                  | 818(55.2%)                   | 663(44.8%)                  |
|                                             | P value                            |                             | 0.911                       |                              | 0.067                       |
| <b>Firstborn</b>                            |                                    |                             |                             |                              |                             |
|                                             | No                                 | 610(59.4%)                  | 417(40.6%)                  | 527(51.3%)                   | 500(48.7%)                  |
|                                             | Yes                                | 1183(59.7%)                 | 799(40.3%)                  | 1084(54.7%)                  | 898(45.3%)                  |
|                                             | P value                            |                             | 0.877                       |                              | 0.078                       |
| <b>Parents</b>                              |                                    |                             |                             |                              |                             |
| <b>Relationship with child</b>              |                                    |                             |                             |                              |                             |
|                                             | Mother                             | 1341(59.7%)                 | 904(40.3%)                  | 1235(55.0%)                  | 1010(45.0%)                 |
|                                             | Father                             | 452(59.2%)                  | 312(40.8%)                  | 376(49.2%)                   | 388(50.8%)                  |
|                                             | P value                            |                             | 0.781                       |                              | 0.006                       |
| <b>Age group</b>                            |                                    |                             |                             |                              |                             |
|                                             | < 26                               | 152(61.0%)                  | 97(39.0%)                   | 100(40.2%)                   | 149(59.8%)                  |
|                                             | 26 –<31                            | 678(62.1%)                  | 413(37.9%)                  | 541(49.6%)                   | 550(50.4%)                  |
|                                             | 31 –<36                            | 682(58.7%)                  | 480(41.3%)                  | 655(56.4%)                   | 507(43.6%)                  |
|                                             | 36 –<41                            | 226(54.2%)                  | 191(45.8%)                  | 257(61.6%)                   | 160(38.4%)                  |
|                                             | ≥41                                | 55(61.1%)                   | 35(38.9%)                   | 58(64.4%)                    | 32(35.6%)                   |
|                                             | P value                            |                             | 0.069                       |                              | 0.000                       |
| <b>Educational level</b>                    |                                    |                             |                             |                              |                             |
|                                             | Junior high school or below        | 209(59.9%)                  | 140(40.1%)                  | 156(44.7%)                   | 193(55.3%)                  |
|                                             | High school graduate or equivalent | 378(67.1%)                  | 185(32.9%)                  | 283(50.3%)                   | 280(49.7%)                  |
|                                             | College or equivalent              | 1099(58.5%)                 | 779(41.5%)                  | 1045(55.6%)                  | 833(44.4%)                  |
|                                             | Master's Diploma or above          | 107(48.9%)                  | 112(51.1%)                  | 127(58.0%)                   | 92(42.0%)                   |
|                                             | P value                            |                             | 0.000                       |                              | 0.000                       |
| <b>Annual household income (10,000 RMB)</b> |                                    |                             |                             |                              |                             |
|                                             | <5                                 | 122(57.3%)                  | 91(42.7%)                   | 102(47.9%)                   | 111(52.1%)                  |
|                                             | 5 –<10                             | 555(63.4%)                  | 321(36.6%)                  | 434(49.5%)                   | 442(50.5%)                  |
|                                             | 10 –<15                            | 475(60.9%)                  | 305(39.1%)                  | 394(50.5%)                   | 386(49.5%)                  |
|                                             | ≥15                                | 641(56.2%)                  | 499(43.8%)                  | 681(59.7%)                   | 459(40.3%)                  |
|                                             | P value                            |                             | 0.009                       |                              | 0.000                       |
| <b>Healthcare occupation</b>                |                                    |                             |                             |                              |                             |
|                                             | Yes                                | 114(61.3%)                  | 72(38.7%)                   | 95(51.1%)                    | 91(48.9%)                   |
|                                             | No                                 | 1679(59.5%)                 | 1144(40.5%)                 | 1516(53.7%)                  | 721(25.5%)                  |
|                                             | P value                            |                             | 0.625                       |                              | 0.487                       |
| <b>Influenza vaccination acceptance</b>     |                                    |                             |                             |                              |                             |
|                                             | Yes                                | 1109(68.8%)                 | 502(31.2%)                  | -                            | -                           |

|         |            |            |   |
|---------|------------|------------|---|
| No      | 684(48.9%) | 714(51.1%) | - |
| P value | 0.000      |            | - |

---

**Table S3 Relationship between vaccine hesitancy with COVID-19 and influenza vaccination acceptance**

| Vaccine hesitancy scale |               | COVID-19 vaccine acceptance |                             |            |             |            | Influenza vaccine acceptance |                             |            |             |            |
|-------------------------|---------------|-----------------------------|-----------------------------|------------|-------------|------------|------------------------------|-----------------------------|------------|-------------|------------|
|                         |               | Yes<br>(N=1793)             | Not Sure and No<br>(N=1216) | P<br>value | Correlation |            | Yes<br>(N=1611)              | Not Sure and<br>No (N=1398) | P<br>value | Correlation |            |
|                         |               |                             |                             |            | value       | P<br>value |                              |                             |            | value       | P<br>value |
| Category<br>A           | Total scores* | 40.96±3.89                  | 40.95±3.84                  | 0.689      | -0.007      | 0.689      | 40.95±3.85                   | 40.97±3.89                  | 0.947      | -0.001      | 0.947      |
|                         | L1            | 4.87±0.40                   | 4.82±0.44                   | 0.000      | 0.064       | 0.000      | 4.86±0.40                    | 4.83±0.43                   | 0.024      | 0.041       | 0.024      |
|                         | L2            | 4.82±0.45                   | 4.76±0.49                   | 0.000      | 0.069       | 0.000      | 4.82±0.44                    | 4.77±0.49                   | 0.002      | 0.056       | 0.002      |
|                         | L3            | 4.82±0.48                   | 4.76±0.53                   | 0.000      | 0.070       | 0.000      | 4.82±0.49                    | 4.77±0.51                   | 0.001      | 0.061       | 0.001      |
|                         | L4            | 4.75±0.57                   | 4.63±0.66                   | 0.000      | 0.097       | 0.000      | 4.74±0.57                    | 4.66±0.65                   | 0.000      | 0.075       | 0.000      |
|                         | L5            | 2.92±1.31                   | 3.04±1.17                   | 0.004      | -0.052      | 0.004      | 2.92±1.30                    | 3.02±1.20                   | 0.021      | -0.042      | 0.021      |
|                         | L6            | 4.61±0.66                   | 4.47±0.72                   | 0.000      | 0.103       | 0.000      | 4.60±0.67                    | 4.5±0.704                   | 0.021      | 0.080       | 0.000      |
|                         | L7            | 4.74±0.55                   | 4.63±0.59                   | 0.000      | 0.112       | 0.000      | 4.72±0.56                    | 4.66±0.57                   | 0.000      | 0.068       | 0.000      |
|                         | L8            | 4.69±0.66                   | 4.62±0.64                   | 0.000      | 0.079       | 0.000      | 4.68±0.64                    | 4.63±0.66                   | 0.007      | 0.049       | 0.007      |
|                         | L9            | 2.61±1.32                   | 2.80±1.23                   | 0.000      | -0.081      | 0.000      | 2.63±1.29                    | 2.75±1.28                   | 0.006      | -0.050      | 0.006      |
|                         | L10           | 2.14±1.28                   | 2.42±1.27                   | 0.000      | -0.123      | 0.000      | 2.15±1.26                    | 2.38±1.30                   | 0.000      | -0.096      | 0.000      |
| Category<br>B           | Total scores* | 38.92±4.87                  | 38.08±5.26                  | 0.000      | 0.074       | 0.000      | 39.34±4.57                   | 37.71±5.42                  | 0.000      | 0.157       | 0.000      |
|                         | L1            | 4.44±0.82                   | 4.20±0.93                   | 0.000      | 0.136       | 0.000      | 4.52±0.76                    | 4.15±0.95                   | 0.000      | 0.209       | 0.000      |
|                         | L2            | 4.47±0.77                   | 4.26±0.85                   | 0.000      | 0.128       | 0.000      | 4.53±0.73                    | 4.22±0.87                   | 0.000      | 0.193       | 0.000      |
|                         | L3            | 4.49±0.78                   | 4.27±0.88                   | 0.000      | 0.137       | 0.000      | 4.56±0.72                    | 4.22±0.91                   | 0.000      | 0.203       | 0.000      |
|                         | L4            | 4.27±0.89                   | 3.99±0.96                   | 0.000      | 0.147       | 0.000      | 4.32±0.87                    | 3.97±0.97                   | 0.000      | 0.187       | 0.000      |
|                         | L5            | 2.80±1.16                   | 2.98±1.04                   | 0.000      | -0.089      | 0.000      | 2.81±1.19                    | 2.95±1.01                   | 0.001      | -0.068      | 0.000      |
|                         | L6            | 4.40±0.79                   | 4.17±0.86                   | 0.000      | 0.138       | 0.000      | 4.44±0.76                    | 4.16±0.88                   | 0.000      | 0.166       | 0.000      |
|                         | L7            | 4.45±0.79                   | 4.24±0.86                   | 0.000      | 0.133       | 0.000      | 4.51±0.74                    | 4.20±0.88                   | 0.000      | 0.188       | 0.000      |
|                         | L8            | 4.33±0.91                   | 4.08±0.97                   | 0.000      | 0.141       | 0.000      | 4.39±0.86                    | 4.05±1.00                   | 0.000      | 0.182       | 0.000      |
|                         | L9            | 2.75±1.21                   | 2.99±1.10                   | 0.000      | -0.102      | 0.000      | 2.78±1.21                    | 2.93±1.13                   | 0.001      | -0.068      | 0.000      |
|                         | L10           | 2.50±1.28                   | 2.89±1.19                   | 0.000      | -0.162      | 0.000      | 2.49±1.27                    | 2.85±1.22                   | 0.000      | -0.149      | 0.000      |

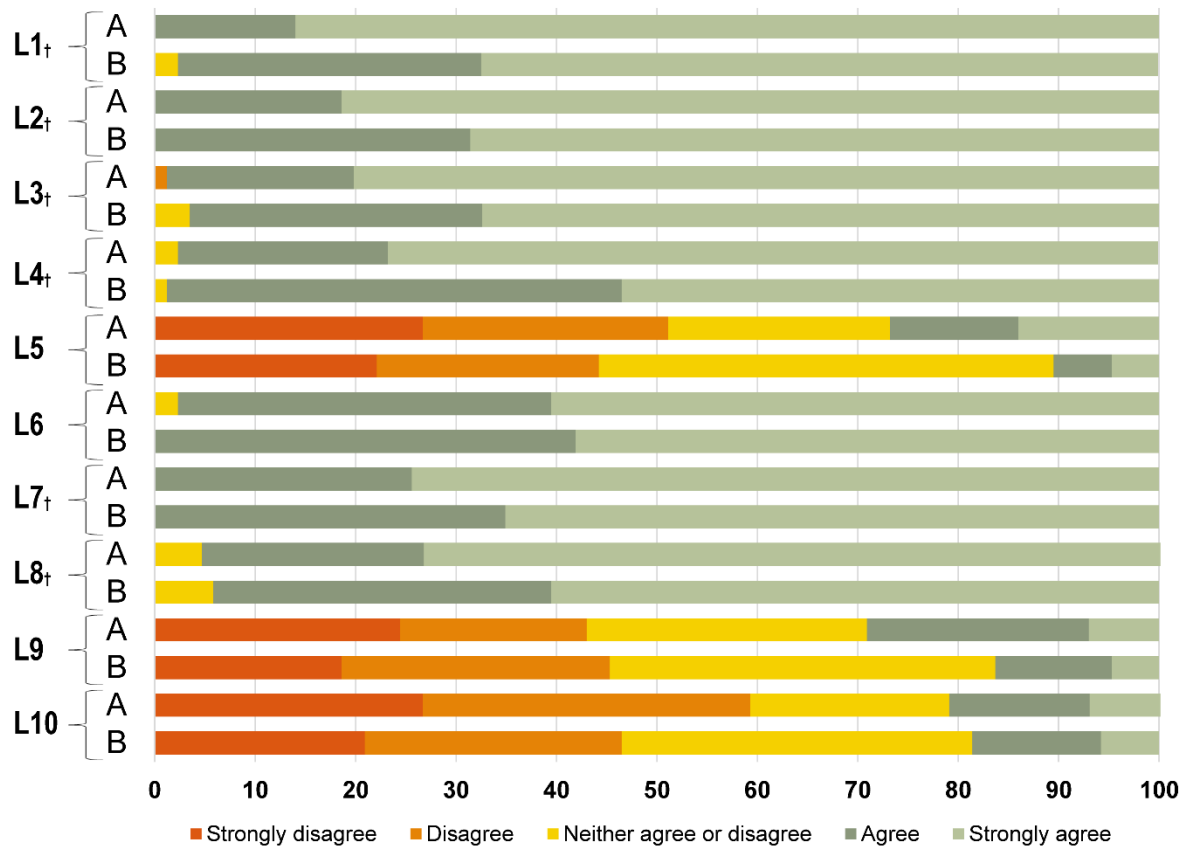

**Figure S6 Distribution of responses to 10-item of the vaccine hesitancy scale for healthcare workers**

†  $P < 0.05$ , A represent category A vaccine, B represent category B vaccine, L1: Childhood vaccines are important for my child's health, L2: Childhood vaccines are effective, L3: Having my child vaccinated is important for the health of others in my community, L4: All childhood vaccines offered by the government programme in my community are beneficial, L5: New vaccines carry more risks than older vaccines, L6: The information I receive about vaccines from the vaccine program is reliable and trustworthy, L7: Getting vaccines is a good way to protect my child/children from disease, L8: Generally I do what my doctor or health care provider recommends about vaccines for my child/children, L9: I am concerned about serious adverse effects of vaccines, L10: My child/children does or do not need vaccines for diseases that are not common anymore.

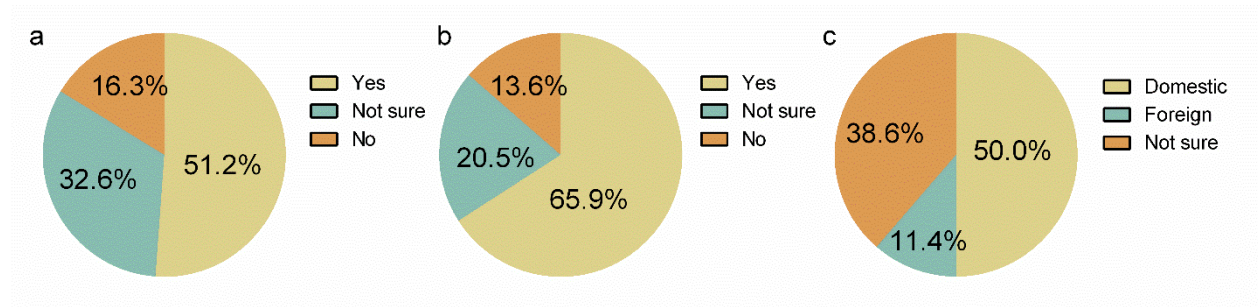

**Figure S7 Healthcare workers' acceptance of vaccination against COVID-19†**

†a: Question: If COVID-19 vaccine is available, will you vaccinate for yourself? b: Question: Will you be vaccinated against COVID-19 as the first population? c: Question: Will you choose domestic or foreign COVID-19 vaccine?

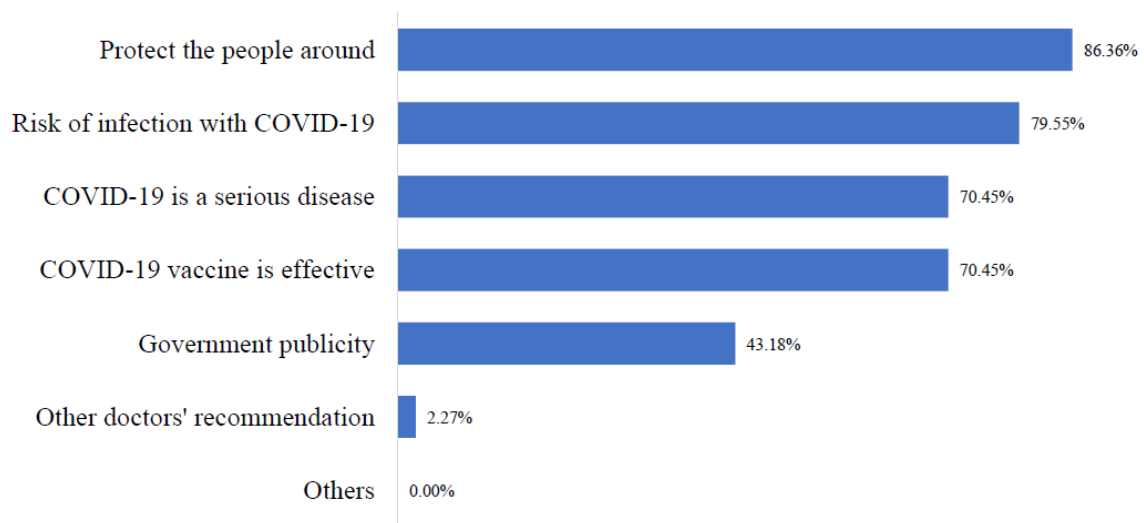

**Figure S8 Reasons being willing to accept vaccine against COVID-19 for healthcare workers**

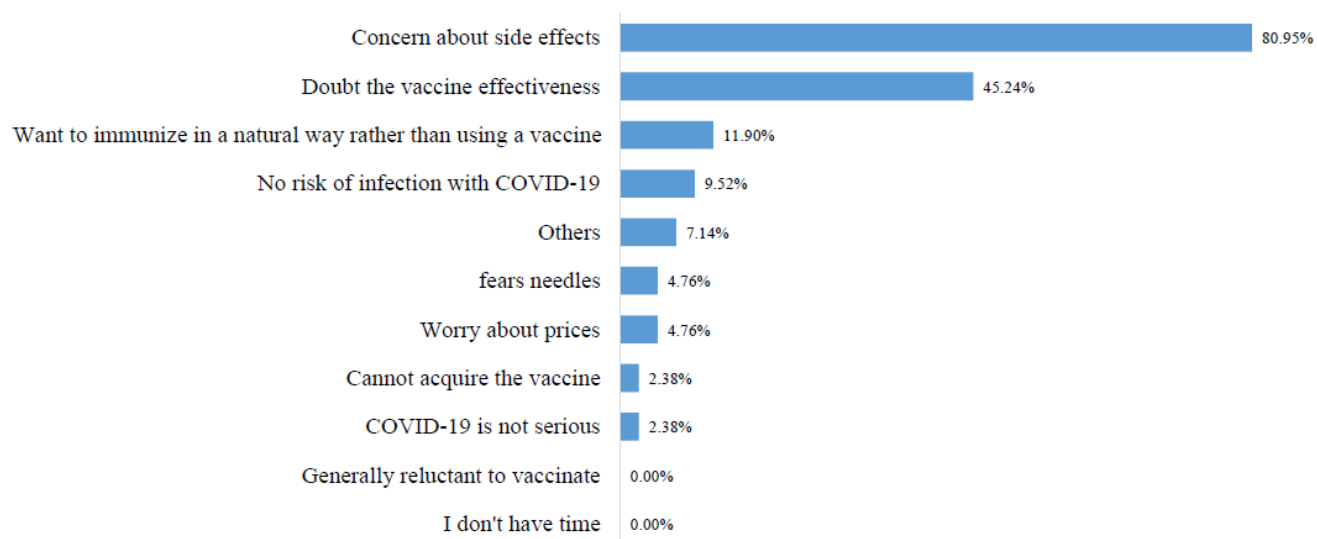

**Figure S9 Reasons being not willing to accept vaccine against COVID-19 for healthcare workers**
